# Supplementary material for: Role of ventral subiculum neuronal ensembles in incubation of oxycodone craving after electric barrier–induced voluntary abstinence
Source: PubMed Central journal article supplement (PMC9833671; doi:10.1126/sciadv.add8687), 2023-01-11
Supplement: sciadv.add8687_sm.pdf [file sciadv.add8687_sm.pdf]

Supplementary Materials for

**Role of ventral subiculum neuronal ensembles in incubation of oxycodone craving after electric barrier–induced voluntary abstinence**

Ida Fredriksson *et al.*

Corresponding author: Ida Fredriksson, [ida.fredriksson@nih.gov](mailto:ida.fredriksson@nih.gov); Yavin Shaham, [yavin.shaham@nih.gov](mailto:yavin.shaham@nih.gov)

*Sci. Adv.* **9**, eadd8687 (2023)  
DOI: 10.1126/sciadv.add8687

**The PDF file includes:**

Tables S1 to S5  
Figs. S1 to S4  
Legend for data S1

**Other Supplementary Material for this manuscript includes the following:**

Data S1

**Table S1.** Statistical analysis for the behavioral results (SPSS GLM repeated-measures module). Partial Eta<sup>2</sup> = proportion of explained variance. For ANCOVAs, the covariate is inactive lever presses. RM, repeated measures; SA, self-administration; M+B, muscimol-baclofen; vSub, ventral subiculum

**Exp. 1.** vSub Fos expression after a test for incubated oxycodone craving on day 15

| Figure number                                                                                                                                                                                                            | Factor name                                                                                                                                                                                                                                                                   | F-value                                                                                                                                                                                      | p-value                                                             | Partial Eta <sup>2</sup>                                    |
|--------------------------------------------------------------------------------------------------------------------------------------------------------------------------------------------------------------------------|-------------------------------------------------------------------------------------------------------------------------------------------------------------------------------------------------------------------------------------------------------------------------------|----------------------------------------------------------------------------------------------------------------------------------------------------------------------------------------------|---------------------------------------------------------------------|-------------------------------------------------------------|
| Figure 1A. Self-administration training<br><u>Infusions</u><br>RM-ANOVA<br>Within-subjects factor: Session                                                                                                               | Session (1-14) within-subjects                                                                                                                                                                                                                                                | F <sub>13,156</sub> = 10.5                                                                                                                                                                   | <0.001*                                                             | 0.466                                                       |
| Figure 1A. Self-administration training<br><u>Active lever presses</u><br>RM-ANOVA<br>Within-subjects factors: Session, Lever                                                                                            | Session (1-14) within-subjects<br>Lever (Active, Inactive) within subjects<br>Lever X Session interaction                                                                                                                                                                     | F <sub>13,156</sub> = 1.8<br>F <sub>1,12</sub> = 7.7<br>F <sub>13,156</sub> = 1.9                                                                                                            | 0.053<br>0.017*<br>0.030*                                           | 0.128<br>0.390<br>0.139                                     |
| Figure 1A. Electric barrier<br><u>Infusions</u><br>RM-ANOVA<br>Within-subjects factor: Session                                                                                                                           | Session (1-13) within-subjects                                                                                                                                                                                                                                                | F <sub>12,144</sub> = 49.3                                                                                                                                                                   | <0.001*                                                             | 0.804                                                       |
| Figure 1A. Electric barrier<br><u>Active lever presses</u><br>RM-ANOVA<br>Within-subjects factors: Session, Lever                                                                                                        | Session (1-13) within-subjects<br>Lever (Active, Inactive) within subjects<br>Lever X Session interaction                                                                                                                                                                     | F <sub>12,144</sub> = 5.4<br>F <sub>1,12</sub> = 0.02<br>F <sub>12,144</sub> = 8.0                                                                                                           | <0.001*<br>0.898<br><0.001*                                         | 0.309<br>0.001<br>0.401                                     |
| Figure 2B. Relapse tests days 1 and 15 (Total 30 min)<br><u>Active lever presses</u><br>RM-ANCOVA<br>Within-subjects factor: Abstinence day<br>Covariates: Inactive day 1, Inactive day 15 (30 min)                      | Abstinence day (1,15) within-subjects                                                                                                                                                                                                                                         | F <sub>1,10</sub> = 6.2                                                                                                                                                                      | 0.032*                                                              | 0.384                                                       |
| Figure 2B. Relapse tests days 1 and 15 (30 min time course)<br><u>Active lever presses</u><br>RM-ANCOVA<br>Within-subjects factors: Abstinence day, Session time<br>Covariates: Inactive day 1, Inactive day 15 (30 min) | Abstinence day (1,15) within-subjects<br>Session time (10, 20, 30) within-subjects<br>Abstinence day X Session time interaction                                                                                                                                               | F <sub>1,10</sub> = 6.2<br>F <sub>2,20</sub> = 17.1<br>F <sub>2,20</sub> = 7.0                                                                                                               | 0.032*<br><0.001*<br>0.005*                                         | 0.384<br>0.631<br>0.412                                     |
| Figure 2C. Fos immunohistochemistry<br><u>vSub Fos Counts</u><br>One-way ANOVA<br>Between-subjects factor: Test condition                                                                                                | Test condition (No Test, Test) between-subjects                                                                                                                                                                                                                               | F <sub>1,11</sub> = 36.3                                                                                                                                                                     | <0.001*                                                             | 0.768                                                       |
| Figure 2D. Fos immunohistochemistry of vSub subregions<br><u>vSub Fos Counts</u><br>Mixed ANOVA<br>Between-subjects factor: Test condition<br>Within-subjects factor: Subdivision<br>Within-subjects factor: subregion   | Test condition (No Test, Test) between-subjects<br>Subregion (Anterior, Posterior) within-subjects<br>Location (Distal, Proximal) within-subjects<br>Location x Subregion<br>Location x Test condition<br>Test condition x Subregion<br>Location x Subregion x Test condition | F <sub>1,11</sub> = 318.4<br>F <sub>1,11</sub> = 7.5<br>F <sub>1,11</sub> = 64.8<br>F <sub>1,11</sub> = 9.6<br>F <sub>1,11</sub> = 7.0<br>F <sub>1,11</sub> = 6.2<br>F <sub>1,11</sub> = 0.3 | <0.001*<br>0.019*<br><0.001*<br>0.010*<br>0.023*<br>0.030*<br>0.594 | 0.967<br>0.407<br>0.855<br>0.465<br>0.389<br>0.360<br>0.027 |

**Exp. 2.** Effect of muscimol-baclofen vSub inactivation on incubation after electric barrier-induced abstinence

| Figure number                                                                                                                                                                                                                     | Factor name                                                                                                                                                                                                                                                                                                                 | F-value                                                                                                                                          | p-value                                                                 | Partial Eta <sup>2</sup>                                        |
|-----------------------------------------------------------------------------------------------------------------------------------------------------------------------------------------------------------------------------------|-----------------------------------------------------------------------------------------------------------------------------------------------------------------------------------------------------------------------------------------------------------------------------------------------------------------------------|--------------------------------------------------------------------------------------------------------------------------------------------------|-------------------------------------------------------------------------|-----------------------------------------------------------------|
| Figure 1B. Self-administration training<br>Infusions<br>RM-ANOVA<br>Within-subjects factor: Session                                                                                                                               | Session (1-14) within-subjects                                                                                                                                                                                                                                                                                              | $F_{13,611} = 41.2$                                                                                                                              | <0.001*                                                                 | 0.467                                                           |
| Figure 1B. Self-administration training<br>Active lever presses<br>RM-ANOVA<br>Within-subjects factors: Session, Lever                                                                                                            | Session (1-14) within-subjects<br>Lever (Active, Inactive) within subjects<br>Lever X Session interaction                                                                                                                                                                                                                   | $F_{13,611} = 16.3$<br>$F_{1,47} = 134.6$<br>$F_{13,611} = 17.9$                                                                                 | <0.001*<br><0.001*<br><0.001*                                           | 0.257<br>0.741<br>0.276                                         |
| Figure 1B. Electric barrier<br>Infusions<br>RM-ANOVA<br>Within-subjects factor: Session                                                                                                                                           | Session (1-12) within-subjects                                                                                                                                                                                                                                                                                              | $F_{11,220} = 30.5$                                                                                                                              | <0.001*                                                                 | 0.604                                                           |
| Figure 1B. Electric barrier<br>Active lever presses<br>RM-ANOVA<br>Within-subjects factors: Session, Lever                                                                                                                        | Session (1-12) within-subjects<br>Lever (Active, Inactive) within subjects<br>Lever X Session interaction                                                                                                                                                                                                                   | $F_{11,220} = 15.9$<br>$F_{1,20} = 0.1$<br>$F_{11,220} = 26.5$                                                                                   | <0.001*<br>0.73<br><0.001*                                              | 0.442<br>0.006<br>0.57                                          |
| Figure 3B. Relapse tests days 1 and 15 (Total 90 min)<br>Active lever presses<br>Two-way ANCOVA<br>Between-subjects factors: Abstinence day, M+B dose<br>Covariate: Inactive (90 min)                                             | Abstinence day (1,15) between-subjects<br>M+B dose (0, 50+50ng/side) between-subjects<br>Abstinence day X M+B dose interaction                                                                                                                                                                                              | $F_{1,43} = 43.4$<br>$F_{1,43} = 10.5$<br>$F_{1,43} = 7.3$                                                                                       | <0.001*<br>0.002*<br>0.01*                                              | 0.502<br>0.197<br>0.144                                         |
| Figure 3B. Relapse tests days 1 and 15 (90 min time course)<br>Active lever presses<br>Mixed ANCOVA<br>Between-subjects factors: Abstinence day, M+B dose<br>Within-subjects factor: Session time<br>Covariate: Inactive (90 min) | Abstinence day (1,15) between-subjects<br>M+B dose (0, 50+50ng/side) between-subjects<br>Abstinence day X M+B dose interaction<br><br>Session time (30, 60, 90) within-subjects<br>Session time X Abstinence day interaction<br>Session time X M+B dose interaction<br>Session time X Abstinence day X M+B dose interaction | $F_{1,43} = 43.3$<br>$F_{1,43} = 10.5$<br>$F_{1,43} = 7.3$<br><br>$F_{2,86} = 62.7$<br>$F_{2,86} = 14.4$<br>$F_{2,86} = 4.4$<br>$F_{2,86} = 2.7$ | <0.001*<br>0.002*<br>0.01*<br><br><0.001*<br><0.001*<br>0.015*<br>0.073 | 0.502<br>0.197<br>0.145<br><br>0.593<br>0.251<br>0.093<br>0.059 |

**Exp. 3.** Effect of muscimol-baclofen vSub inactivation on incubation after forced abstinence

| Figure number                                                                                                                                                | Factor name                                                                                               | F-value                                                       | p-value                       | Partial Eta <sup>2</sup> |
|--------------------------------------------------------------------------------------------------------------------------------------------------------------|-----------------------------------------------------------------------------------------------------------|---------------------------------------------------------------|-------------------------------|--------------------------|
| Figure 1C. Self-administration training<br>Infusions<br>RM-ANOVA<br>Within-subjects factor: Session                                                          | Session (1-14) within-subjects                                                                            | $F_{13,429} = 20.0$                                           | <0.001*                       | 0.377                    |
| Figure 1C. Self-administration training<br>Active Lever presses<br>RM-ANOVA<br>Within-subjects factors: Session, Lever                                       | Session (1-14) within-subjects<br>Lever (Active, Inactive) within subjects<br>Lever X Session interaction | $F_{13,429} = 4.8$<br>$F_{1,33} = 48.6$<br>$F_{13,429} = 5.4$ | <0.001*<br><0.001*<br><0.001* | 0.128<br>0.596<br>0.140  |
| Figure 4B. Relapse test day 15 (Total 90 min)<br>Active lever presses<br>One-Way ANCOVA<br>Between-subjects factor: M+B dose<br>Covariate: Inactive (90 min) | M+B dose (0, 50+50ng/side) between-subjects                                                               | $F_{1,31} = 0.2$                                              | 0.644                         | 0.007                    |

|                                                                                                                                                                                                                 |                                                                                                                                 |                                                           |                           |                         |
|-----------------------------------------------------------------------------------------------------------------------------------------------------------------------------------------------------------------|---------------------------------------------------------------------------------------------------------------------------------|-----------------------------------------------------------|---------------------------|-------------------------|
| Figure 4B. Relapse test day 15 (90 min time course)<br><u>Active lever presses</u><br>Mixed ANCOVA<br>Between-subjects factor: M+B dose<br>Within-subjects factor: Session time<br>Covariate: Inactive (90 min) | M+B dose (0, 50+50ng/side) between-subjects<br>Session time (30, 60, 90) within-subjects<br>Session time X M+B dose interaction | $F_{1,31} = 0.2$<br>$F_{2,62} = 30.2$<br>$F_{2,62} = 0.4$ | 0.644<br><0.001*<br>0.671 | 0.007<br>0.494<br>0.013 |
|-----------------------------------------------------------------------------------------------------------------------------------------------------------------------------------------------------------------|---------------------------------------------------------------------------------------------------------------------------------|-----------------------------------------------------------|---------------------------|-------------------------|

**Exp. 4. Effect of Daun02 vSub inactivation on incubation after electric barrier-induced abstinence**

| Figure number                                                                                                                                                                                                                  | Factor name                                                                                                          | F-value                                                         | p-value                       | Partial Eta <sup>2</sup> |
|--------------------------------------------------------------------------------------------------------------------------------------------------------------------------------------------------------------------------------|----------------------------------------------------------------------------------------------------------------------|-----------------------------------------------------------------|-------------------------------|--------------------------|
| Figure 1D. Self-administration training<br><u>Infusions</u><br>RM-ANOVA<br>Within-subjects factor: Session                                                                                                                     | Session (1-14) within-subjects                                                                                       | $F_{13,754} = 85.2$                                             | <0.001*                       | 0.595                    |
| Figure 1D. Self-administration training<br><u>Active lever presses</u><br>RM-ANOVA<br>Within-subjects factors: Session, Lever                                                                                                  | Session (1-14) within-subjects<br>Lever (Active, Inactive) within subjects<br>Lever X Session interaction            | $F_{13,754} = 14.8$<br>$F_{1,58} = 55.8$<br>$F_{13,754} = 14.6$ | <0.001*<br><0.001*<br><0.001* | 0.203<br>0.490<br>0.201  |
| Figure 1D. Electric barrier<br><u>Infusions</u><br>RM-ANOVA<br>Within-subjects factor: Session                                                                                                                                 | Session (1-13) within-subjects                                                                                       | $F_{12,696} = 139.1$                                            | <0.001*                       | 0.706                    |
| Figure 1D. Electric barrier<br><u>Active lever presses</u><br>RM-ANOVA<br>Within-subjects factors: Session, Lever                                                                                                              | Session (1-13) within-subjects<br>Lever (Active, Inactive) within subjects<br>Lever X Session interaction            | $F_{12,696} = 27.6$<br>$F_{1,58} = 11.4$<br>$F_{12,696} = 33.5$ | <0.001*<br>0.001*<br><0.001*  | 0.323<br>0.164<br>0.366  |
| SA context Induction session day 15 (15 min)                                                                                                                                                                                   | Daun02 dose (0, 4µg/side) between-subjects                                                                           | $F_{1,23} = 0.02$                                               | 0.896                         | 0.001                    |
| Figure 5B. SA context Relapse test day 18 (Total 90 min)<br><u>Active lever presses</u><br>One-Way ANCOVA<br>Between-subjects factor: Daun02 dose<br>Covariate: Inactive (90 min)                                              | Daun02 dose (0, 4µg/side) between-subjects                                                                           | $F_{1,23} = 4.5$                                                | 0.044*                        | 0.165                    |
| Figure 5B. SA context Relapse tests day 18 (90 min time course)<br><u>Active lever presses</u><br>Mixed ANCOVA<br>Between-subjects factor: Daun02 dose<br>Within-subjects factor: Session time<br>Covariate: Inactive (90 min) | Daun02 dose (0, 4µg/side) between-subjects<br>Session time within-subjects<br>Session time X Daun02 dose interaction | $F_{1,23} = 4.5$<br>$F_{2,46} = 20.9$<br>$F_{2,46} = 1.1$       | 0.044*<br><0.001*<br>0.332    | 0.165<br>0.476<br>0.047  |
| Figure 5C. SA context vSub<br>Fos-Xgal immunohistochemistry<br><u>Fos and Xgal counts</u><br>One-way ANOVA<br>Between-subjects factor: Daun02 dose                                                                             | Fos: Daun02 dose (0, 4µg/side) between-subjects<br>Xgal: Daun02 dose (0, 4µg/side) between-subjects                  | $F_{1,24} = 50.3$<br>$F_{1,24} = 33.1$                          | <0.001*<br><0.001*            | 0.677<br>0.580           |

|                                                                                                                                                                                                                                         |                                                                                                                      |                                                            |                          |                         |
|-----------------------------------------------------------------------------------------------------------------------------------------------------------------------------------------------------------------------------------------|----------------------------------------------------------------------------------------------------------------------|------------------------------------------------------------|--------------------------|-------------------------|
| Figure 5B. Novel context<br>Relapse test day 18 (Total 90 min)<br><u>Active lever presses</u><br>One-Way ANCOVA<br>Between-subjects factor:<br>Daun02 dose<br>Covariate: Inactive (90 min)                                              | Daun02 dose (0, 4µg/side) between-subjects                                                                           | $F_{1,30} = 0.08$                                          | 0.779                    | 0.003                   |
| Figure 5B. Novel context<br>Relapse tests day 18 (90 min time course)<br><u>Active lever presses</u><br>Mixed ANCOVA<br>Between-subjects factor:<br>Daun02 dose<br>Within-subjects factor: Session time<br>Covariate: Inactive (90 min) | Daun02 dose (0, 4µg/side) between-subjects<br>Session time within-subjects<br>Session time X Daun02 dose interaction | $F_{1,30} = 0.08$<br>$F_{2,60} = 39.1$<br>$F_{2,60} = 0.8$ | 0.779<br><0.001*<br>0.46 | 0.003<br>0.566<br>0.026 |
| Figure 5C. Novel context vSub<br>Fos-Xgal immunohistochemistry<br><u>Fos and Xgal counts</u><br>One-way ANOVA<br>Between-subjects factor:<br>Daun02 dose                                                                                | Fos: Daun02 dose (0, 4µg/side) between-subjects<br>Xgal: Daun02 dose (0, 4µg/side) between-subjects                  | $F_{1,31} = 0.5$<br>$F_{1,31} = 0.3$                       | 0.491<br>0.618           | 0.015<br>0.008          |

**Exp. 5. Molecular phenotyping of vSub Fos-cells with FACS+qPCR (Behavioral results)**

| Figure number                                                                                                                                                 | Factor name                                                                                                 | F-value                                                        | p-value                       | Partial Eta <sup>2</sup> |
|---------------------------------------------------------------------------------------------------------------------------------------------------------------|-------------------------------------------------------------------------------------------------------------|----------------------------------------------------------------|-------------------------------|--------------------------|
| Figure S4B. Self-administration training<br><u>Infusions</u><br>RM-ANOVA<br>Within-subjects factor: Session                                                   | Session (1-14) within-subjects                                                                              | $F_{13,156} = 5.6$                                             | <0.001*                       | 0.316                    |
| Figure S4B. Self-administration training<br><u>Active lever presses</u><br>RM-ANOVA<br>Within-subjects factors:<br>Session, Lever                             | Session (1-14) within-subjects<br>Lever (Active, Inactive) within subjects<br>Lever X Session interaction   | $F_{13,156} = 2.3$<br>$F_{1,12} = 10.2$<br>$F_{13,156} = 2.5$  | 0.010*<br>0.008*<br>0.004*    | 0.158<br>0.459<br>0.173  |
| Figure S4B. Electric barrier<br><u>Infusions</u><br>RM-ANOVA<br>Within-subjects factor: Session                                                               | Session (1-11) within-subjects                                                                              | $F_{10,120} = 36.5$                                            | <0.001*                       | 0.752                    |
| Figure S4B. Electric barrier<br><u>Active lever presses</u><br>RM-ANOVA<br>Within-subjects factors:<br>Session, Lever                                         | Session (1-11) within-subjects<br>Lever (Active, Inactive) within-subjects<br>Lever X Session interaction   | $F_{10,120} = 7.1$<br>$F_{1,12} = 0.11$<br>$F_{10,120} = 12.0$ | <0.001*<br>0.741<br><0.001*   | 0.372<br>0.009<br>0.500  |
| Figure S4C. SA context<br>Relapse tests day 15 (90 min time course)<br><u>Active lever presses</u><br>RM-ANOVA<br>Within-subjects factor: Session time, Lever | Session time within-subjects<br>Lever (Active, Inactive) within-subjects<br>Session time X Leve interaction | $F_{2,24} = 36.0$<br>$F_{1,12} = 64.9$<br>$F_{2,24} = 36.5$    | <0.001*<br><0.001*<br><0.001* | 0.750<br>0.844<br>0.752  |

**Table S2.** Statistical analysis for the qPCR results. Analyses are with linear mixed effects modeling with cell type (nominal) as a fixed within-subjects factor and sample number as a random factor.

**Exp. 5.** Molecular phenotyping of vSub Fos-positive cells with FACS+qPCR (qPCR results). Fold changes are relative to Fos-negative cells, Mean±SEM)

| Gene                               | Fold change | Linear mixed-effects modeling in JMP  |
|------------------------------------|-------------|---------------------------------------|
| <b>Acetylcholine-related genes</b> |             |                                       |
| <i>Chrna2</i>                      | 2.4±0.6     | F <sub>1,1.1024</sub> =834.4, p=0.02* |
| <i>Chrna3</i>                      | 0.4±0.2     | F <sub>1,5.314</sub> =12.3, p=0.016*  |
| <i>Chrna4</i>                      | 0.9±0.4     | F <sub>1,4.449</sub> =0.34, p=0.59    |
| <i>Chrna5</i>                      | 1.7±0.9     | F <sub>1,4.218</sub> =1.1, p=0.35     |
| <i>Chrna7</i>                      | 1.4±0.2     | F <sub>1,4.94</sub> =3.0, p=0.14      |
| <i>Chrm1</i>                       | 0.9±0.1     | F <sub>1,4.84</sub> =0.94, p=0.38     |
| <i>Chrm2</i>                       | 0.7±0.2     | F <sub>1,3.377</sub> =0.61, p=0.48    |
| <i>Chrm3</i>                       | 0.9±0.1     | F <sub>1,5.05</sub> =0.20, p=0.67     |
| <i>Chrm4</i>                       | 1.2±0.4     | F <sub>1,5.207</sub> =0.22, p=0.66    |
| <i>Chrm5</i>                       | 0.9±0.1     | F <sub>1,4.422</sub> =1.5, p=0.28     |
| <b>Dopamine-related genes</b>      |             |                                       |
| <i>Drd1</i>                        | 0.8±0.1     | F <sub>1,3.803</sub> =1.5, p=0.28     |
| <i>Drd2</i>                        | 3.7±1.2     | F <sub>1,4.884</sub> =5.0, p=0.071    |
| <b>GABA-related genes</b>          |             |                                       |
| <i>Gabra1</i>                      | 0.8±0.2     | F <sub>1,5.015</sub> =1.4, p=0.29     |
| <i>Gabra3</i>                      | 2.8±0.5     | F <sub>1,4.857</sub> =10.5, p=0.024   |
| <i>Gabra5</i>                      | 1.2±0.3     | F <sub>1,4.861</sub> =0.64, p=0.46    |
| <i>Gabbr2</i>                      | 0.8±0.2     | F <sub>1,4.431</sub> =1.3, p=0.32     |
| <i>Gabrg2</i>                      | 0.9±0.1     | F <sub>1,5.26</sub> =0.12, p=0.75     |
| <b>Glutamate-related genes</b>     |             |                                       |
| <i>Gria1</i>                       | 0.9±0.1     | F <sub>1,4.31</sub> =7.7, p=0.046     |
| <i>Gria2</i>                       | 1.0±0.1     | F <sub>1,4.627</sub> =0.01, p=0.92    |
| <i>Gria3</i>                       | 1.4±0.1     | F <sub>1,4.853</sub> =7.1, p=0.046    |
| <i>Gria4</i>                       | 0.8±0.1     | F <sub>1,4.204</sub> =12.9, p=0.021   |
| <i>Grin1</i>                       | 1.1±0.1     | F <sub>1,4.918</sub> =0.62, p=0.47    |
| <i>Grin2a</i>                      | 0.9±0.1     | F <sub>1,5.127</sub> =0.49, p=0.52    |
| <i>Grin2b</i>                      | 0.9±0.1     | F <sub>1,4.886</sub> =0.34, p=0.59    |
| <i>Grm1</i>                        | 1.1±0.2     | F <sub>1,4.813</sub> =0.44, p=0.54    |
| <i>Grm2</i>                        | 0.7±0.2     | F <sub>1,5.017</sub> =6.3, p=0.053    |
| <i>Grm3</i>                        | 1.4±0.4     | F <sub>1,5.215</sub> =1.3, p=0.31     |
| <i>Grm4</i>                        | 2.4±0.8     | F <sub>1,2.333</sub> =11.8, p=0.06    |
| <i>Grm5</i>                        | 1.0±0.2     | F <sub>1,4.954</sub> =0.00, p=1.0     |
| <b>Immediate early genes</b>       |             |                                       |
| <i>Fos</i>                         | 6.0±2.7     | F(1,5.025)=5.068, p=0.074             |
| <i>Arc</i>                         | 5.2±1.0     | F(1,5.066)=21.500, p=0.006*           |
| <b>Opioid-related genes</b>        |             |                                       |
| <i>Oprm1</i>                       | 2.3±0.1     | F <sub>1,4.442</sub> =18.446, p=0.01  |
| <i>Oprd1</i>                       | 0.8±0.1     | F <sub>1,5.238</sub> =1.3, p=0.3      |
| <i>Opcml</i>                       | 1.1±0.3     | F <sub>1,4.741</sub> =0.20, p=0.671   |

**Table S3.** Primer/probe sequences used for qPCR of FACS-isolated neurons

| <b>Gene</b>    | <b>TaqMan probe</b> | <b>Forward primer</b> | <b>Reverse primer</b> |
|----------------|---------------------|-----------------------|-----------------------|
| <i>NeuN</i>    | CACTCCAACAGCGTGAC   | GGCCCCTGGCAGAAAAGTAG  | TTCCCCCTGGTCCTTCTGA   |
| <i>Fos</i>     | Rn00487426_g1       |                       |                       |
| <i>Arc</i>     | Rn00571208_g1       |                       |                       |
| <i>Gria1</i>   | Rn00709588_m1       |                       |                       |
| <i>Gria2</i>   | Rn00568514_m1       |                       |                       |
| <i>Gria3</i>   | Rn00583547_m1       |                       |                       |
| <i>Gria4</i>   | Rn00568544_m1       |                       |                       |
| <i>Grin1</i>   | Rn01436038_m1       |                       |                       |
| <i>Grin2a</i>  | Rn00561341_m1       |                       |                       |
| <i>Grin2b</i>  | Rn00680474_m1       |                       |                       |
| <i>Grm1</i>    | Rn01440619_m1       |                       |                       |
| <i>Grm2</i>    | Rn01447672_m1       |                       |                       |
| <i>Grm3</i>    | Rn01755349_m1       |                       |                       |
| <i>Grm4</i>    | Rn01428450_m1       |                       |                       |
| <i>Grm5</i>    | Rn00690337_m1       |                       |                       |
| <i>Gabra1</i>  | Rn00788315_m1       |                       |                       |
| <i>Gabra3</i>  | Rn00567055_m1       |                       |                       |
| <i>Gabra5</i>  | Rn00568803_m1       |                       |                       |
| <i>Gabbr2</i>  | Rn00582550_m1       |                       |                       |
| <i>Gabrag2</i> | Rn01464079_m1       |                       |                       |
| <i>Drd1</i>    | Rn03062203_s1       |                       |                       |
| <i>Drd2</i>    | Rn00561126_m1       |                       |                       |
| <i>Oprm1</i>   | Rn00565144_m1       |                       |                       |
| <i>Oprd1</i>   | Rn07310941_m1       |                       |                       |
| <i>Opcml</i>   | Rn00587759_m1       |                       |                       |
| <i>Chrna2</i>  | Rn00591542_m1       |                       |                       |
| <i>Chrna3</i>  | Rn00583820_m1       |                       |                       |
| <i>Chrna4</i>  | Rn00577436_m1       |                       |                       |
| <i>Chrna5</i>  | Rn00567155_m1       |                       |                       |
| <i>Chrna7</i>  | Rn00563223_m1       |                       |                       |
| <i>Chrm1</i>   | Rn00589936_m1       |                       |                       |
| <i>Chrm2</i>   | Rn02532311_s1       |                       |                       |
| <i>Chrm3</i>   | Rn00560986_s1       |                       |                       |
| <i>Chrm4</i>   | Rn01512605_s1       |                       |                       |
| <i>Chrm5</i>   | Rn02758749_s1       |                       |                       |

**Table S4.** Summary of Pearson *r* correlations between self-administration- and voluntary abstinence-related functional connectivity changes and the incubation score for the data described in Figures 6-7. \* p-value < 0.05; \*\* p-value < 0.01.

| Figure number                                        | Seed area                          | Target area                   | Food             | Oxycodone         |
|------------------------------------------------------|------------------------------------|-------------------------------|------------------|-------------------|
| Figure 6B. Self-administration phase                 | Right vSub                         | Cingulate cortex              | <i>r</i> = -0.16 | <i>r</i> = -0.10  |
|                                                      |                                    | Dorsal hippocampus            | <i>r</i> = -0.16 | <i>r</i> = -0.31  |
| Figure 7B. Self-administration phase                 | [Right vSub]<br>Dorsal hippocampus | Medial orbital frontal cortex | <i>r</i> = -0.40 | <i>r</i> = 0.27   |
|                                                      |                                    | Sensory cortex                | <i>r</i> = -0.17 | <i>r</i> = 0.21   |
|                                                      |                                    | Dorsal striatum               | <i>r</i> = -0.05 | <i>r</i> = 0.36   |
|                                                      |                                    | Thalamus                      | <i>r</i> = -0.29 | <i>r</i> = 0.02   |
|                                                      |                                    | Dorsal hippocampus            | <i>r</i> = -0.05 | <i>r</i> = 0.19   |
|                                                      |                                    | Ventral subiculum             | <i>r</i> = -0.27 | <i>r</i> = -0.30  |
| Figure 6C. Electric barrier-induced abstinence phase | Right vSub                         | Retrosplenial cortex          | <i>r</i> = 0.31  | <i>r</i> = -0.50* |

**Table S5.** Summary of Pearson *r* correlations between the functional connectivity at early abstinence (day 2) and the incubation score for the data described in main text Figures 6-7. \* p-value < 0.05; \*\* p-value < 0.01.

| Figure number                                                | Seed area                          | Target area                   | Food              | Oxycodone          |
|--------------------------------------------------------------|------------------------------------|-------------------------------|-------------------|--------------------|
| Figure 6D (left). Self-administration phase                  | Right vSub                         | Cingulate cortex              | <i>r</i> = 0.06   | <i>r</i> = -0.27   |
|                                                              |                                    | Dorsal hippocampus            | <i>r</i> = 0.15   | <i>r</i> = -0.56*  |
| Figure 7C. Self-administration phase                         | [Right vSub]<br>Dorsal hippocampus | Medial orbital frontal cortex | <i>r</i> = -0.16  | <i>r</i> = 0.47*   |
|                                                              |                                    | Sensory cortex                | <i>r</i> = -0.24  | <i>r</i> = 0.54*   |
|                                                              |                                    | Dorsal striatum               | <i>r</i> = -0.008 | <i>r</i> = 0.61**  |
|                                                              |                                    | Thalamus                      | <i>r</i> = -0.20  | <i>r</i> = 0.11    |
|                                                              |                                    | Dorsal hippocampus            | <i>r</i> = -0.12  | <i>r</i> = 0.39    |
|                                                              |                                    | Ventral subiculum             | <i>r</i> = 0.08   | <i>r</i> = -0.59** |
| Figure 6D (right). Electric barrier-induced abstinence phase | Right vSub                         | Retrosplenial cortex          | <i>r</i> = -0.04  | <i>r</i> = -0.45*  |



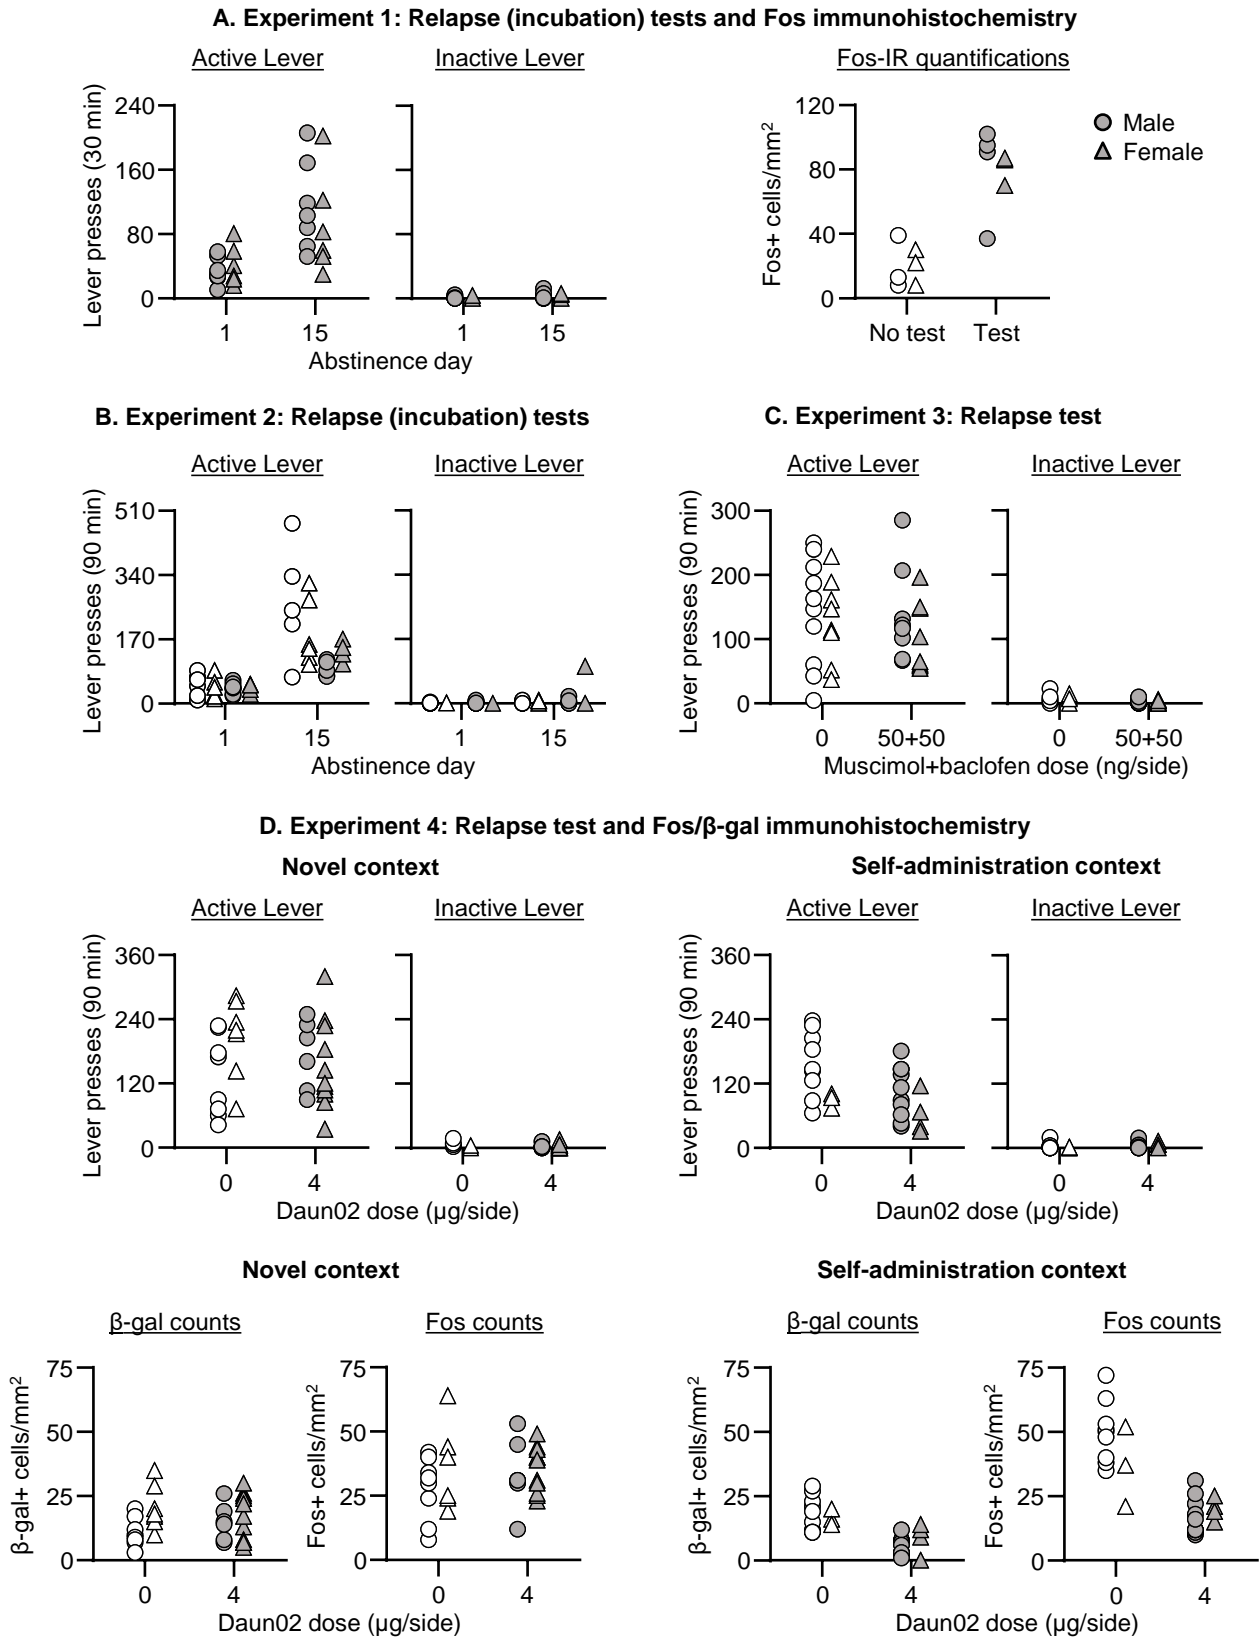

**Figure S1.** (A-C) Number of active and inactive lever presses during the relapse tests of individual rats in Exp. 1-3, and Fos-positive cells (counts/mm<sup>2</sup>) of individual rats in Exp. 1. (D) Number of active and inactive lever presses during the relapse tests and number of  $\beta$ -gal-positive or Fos-positive cells (counts/mm<sup>2</sup>) of individual rats in Exp. 4.  $\beta$ -gal+,  $\beta$ -gal-positive; Fos+, Fos-positive.

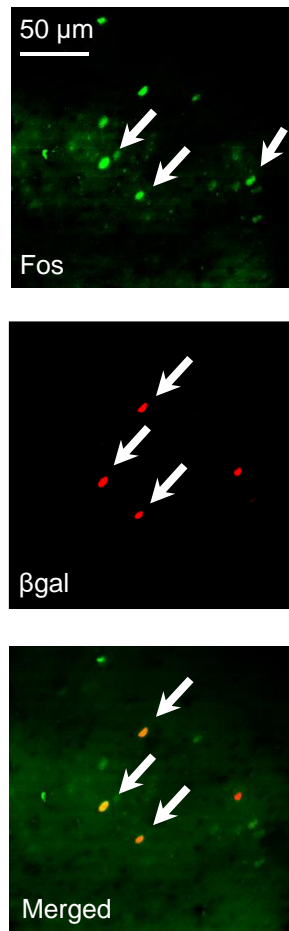

**Figure S2.** Representative images of Fos-positive,  $\beta$ -gal-positive, and Fos-positive  $\beta$ -gal-positive double labeling cells in vSub at 40X magnification in *c-fos-lacZ* transgenic rats exposed to a novel context (n=2). Fos expression (green-labeled nuclei),  $\beta$ -gal expression (red-labeled nuclei), and nuclei double-labeled for both  $\beta$ -gal and Fos appear yellow to orange in the merged image panel and indicate co-localization of  $\beta$ -gal and Fos proteins.

**Figure S3.** Flowchart of the image analyses

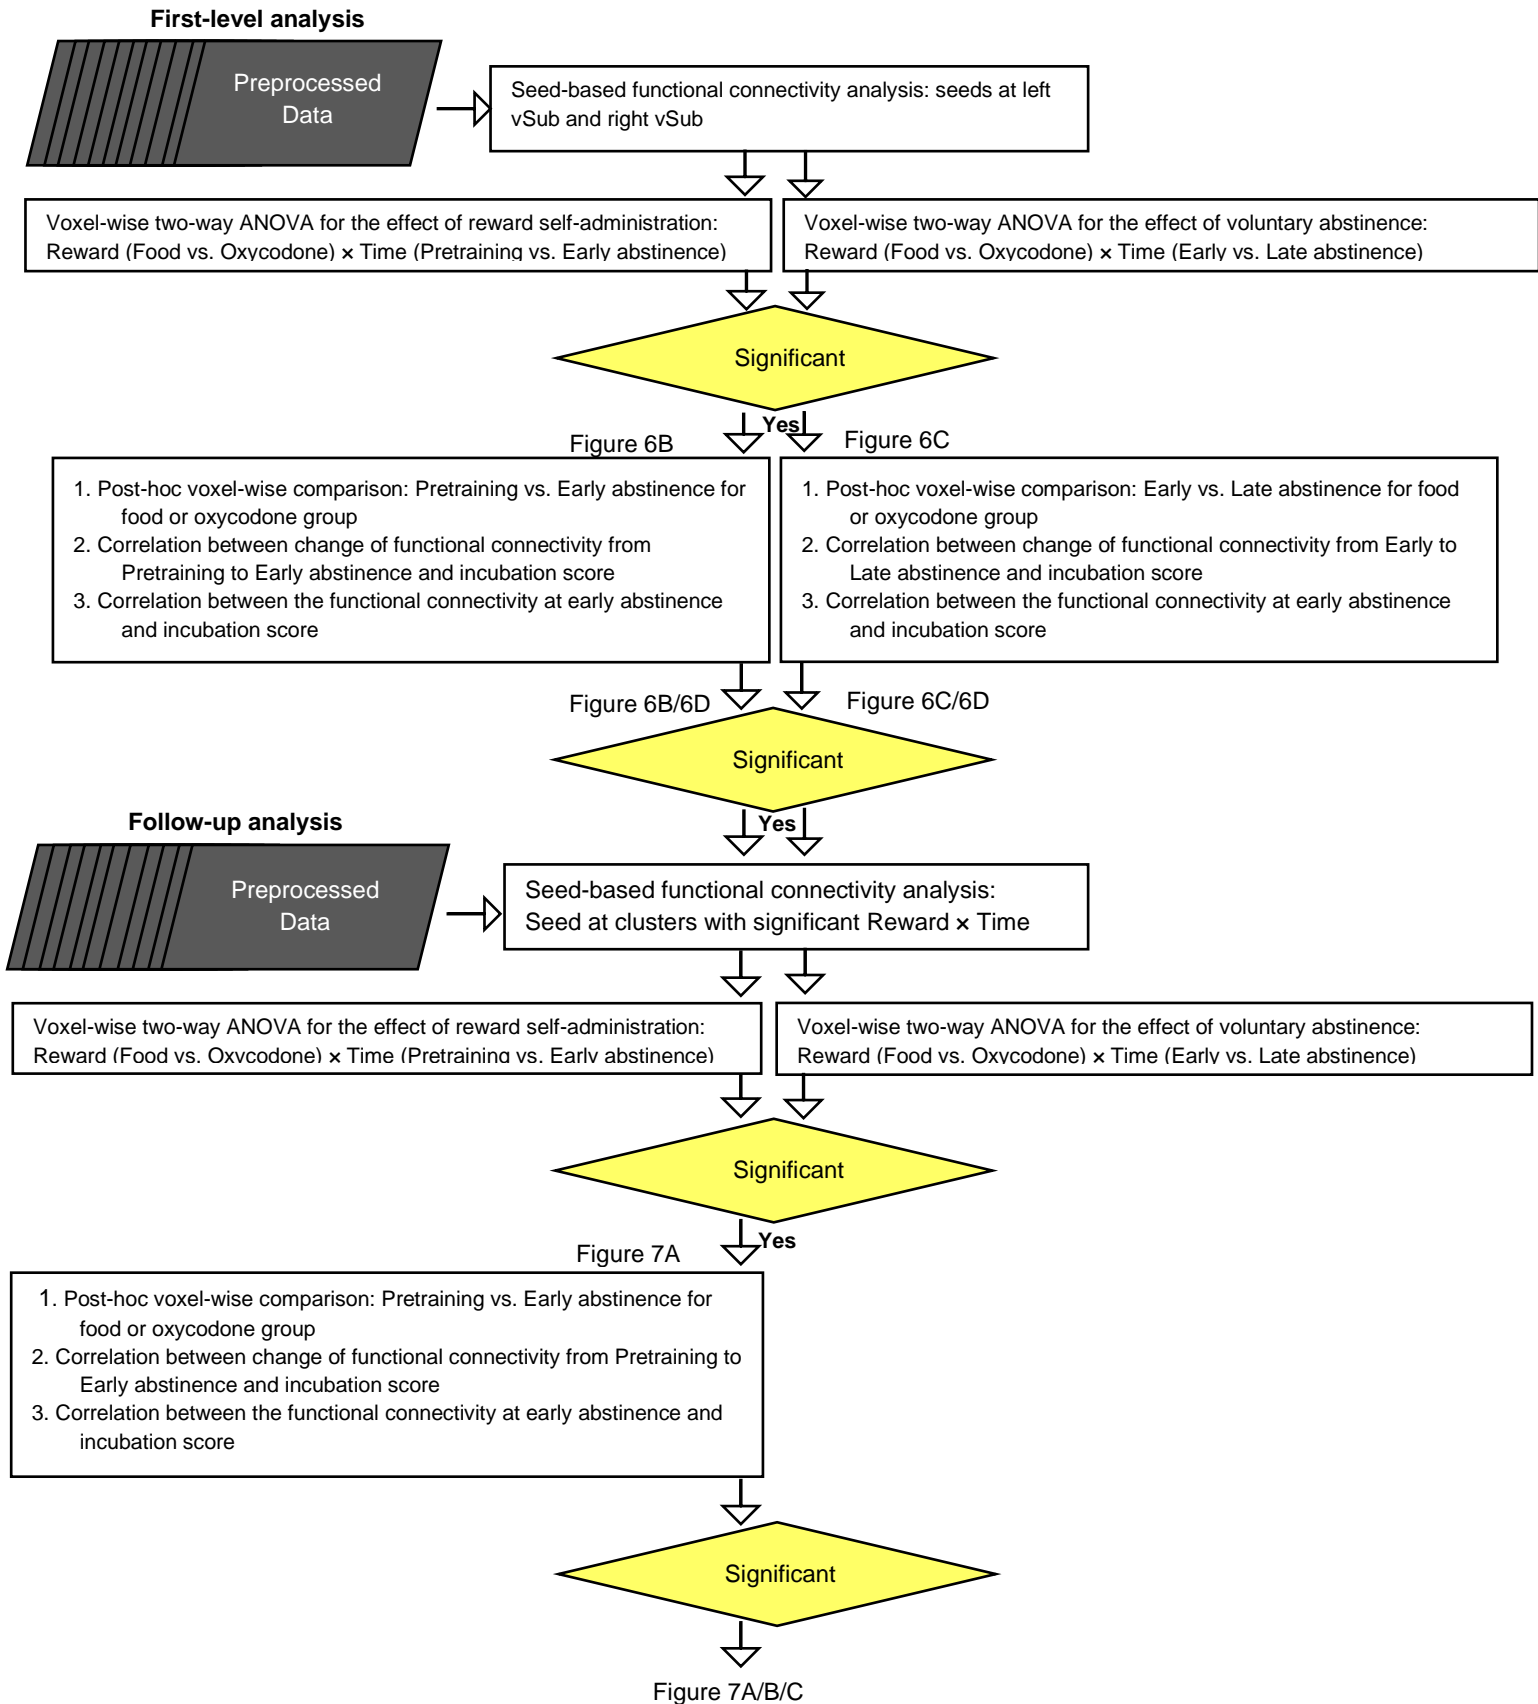

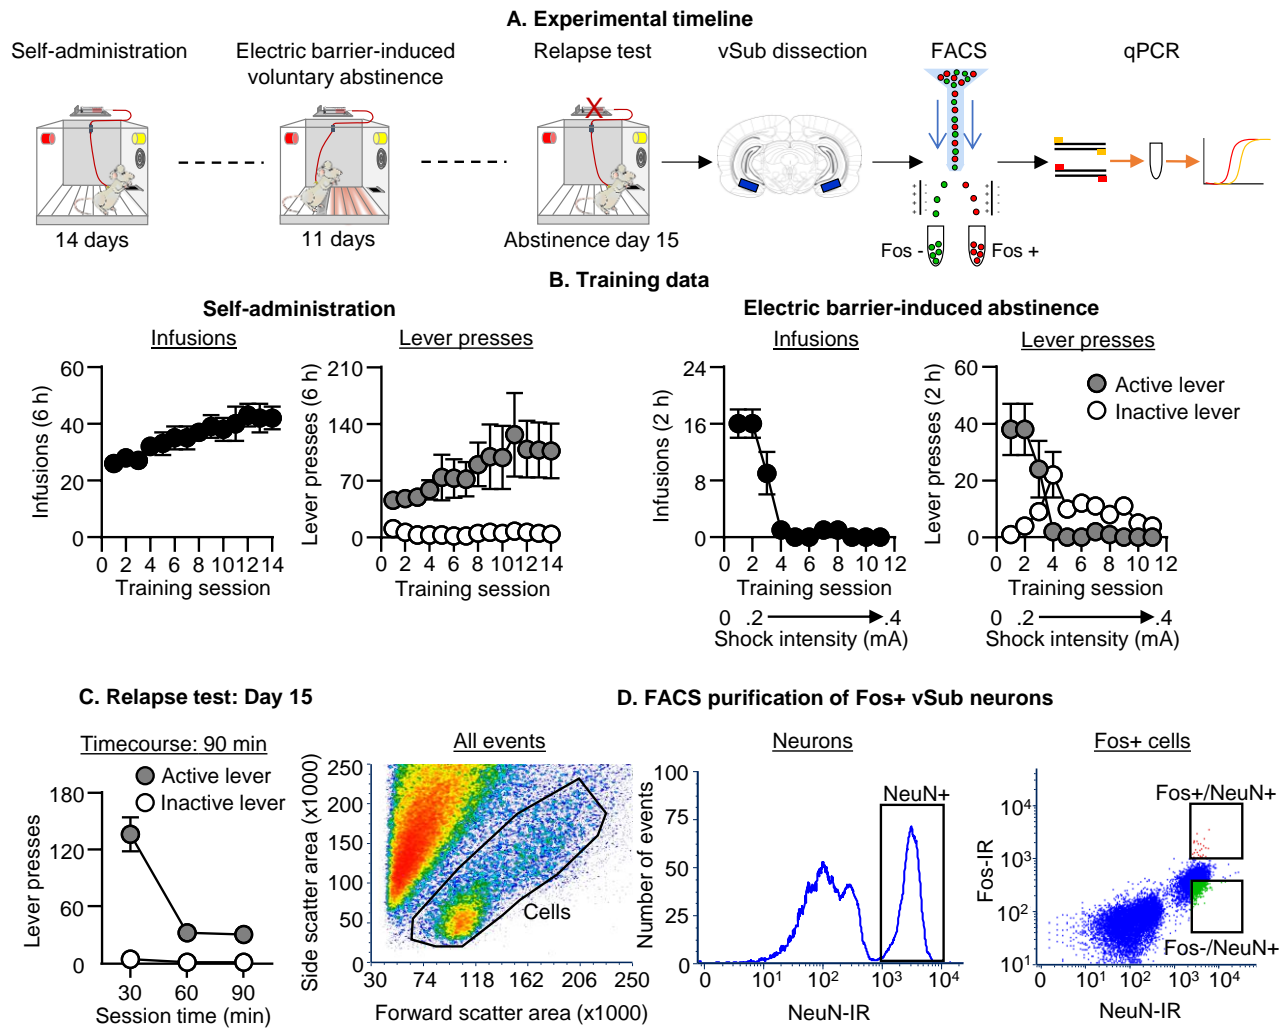

**Figure S4. Behavioral data of Exp. 5 and the FACS procedure. (A)** Timeline of Exp. 5. **(B) Left: Self-administration training.** Mean $\pm$ SEM number of infusions and active and inactive lever presses during the training phase ( $n=13$ ). **Right: Electric barrier-induced abstinence.** Mean $\pm$ SEM number of infusions and active and inactive lever presses during the electric barrier phase. **(C) Relapse (incubation) test:** Mean $\pm$ SEM number of active and inactive lever presses during the 90-min day 15 test session. **(D) FACS purification of Fos-positive vSub neurons:** *All events (Left):* Representative density plot (red is most dense and blue is least dense) based on their forward scatter (X-axis, cell size) and side scatter (Y-axis, granularity) properties. The “Cells” gate, marked in black, represents  $\sim 8\%$  of total events. *Neurons (Middle):* Representative histogram shows 35% Phycoerythrin (PE)-labeled NeuN-positive events (neurons) within “Cells” gate after duplet exclusion (not shown). *Sorting gates (Right):* Representative dot plot shows PE-(NeuN, x-axis) and Alexa Fluor 647-(Fos, y-axis) fluorescence intensity. Gates show Fos-positive/NeuN-positive events (activated neurons, red dots) and Fos-negative/NeuN-positive events (nonactivated neurons, green dots) collected for qPCR. Fos+, Fos-positive; NeuN+, NeuN-positive.

**Data S1.** *Individual data of the behavioral part of the study, immunohistochemistry, and the qPCR.* All the raw data for Exp. 1-5 are provided in Data S1.
